# Supplementary material
Source: publisher figshare collection journal article supplement (https://aacr.figshare.com/ndownloader/files/41536592)
Supplement: Supplementary file 1 [file 41536592]

## Sheet: Table S4
Table S4. Univariate analysis for 17 imaging and biopsy validated nonalcoholic fatty liver disease (NAFLD) SNPs in the Pancreatic Cancer Cohort Consortium (PanScan) sample
							Published Estimates (ref #1)				Association with Pancreatic Cancer
SNP	Nearby Gene	Chr.	Position (GRCh37)	Effect Allele	Ref. Allele	Effect Allele Freq. exposure	Beta est. exposure	Std. error exposure	p-value exposure		Effect Allele Freq. outcome	Beta est. outcome	Std. error outcome	p-value outcome	Reason for removal from the final set of SNPs
rs738408	PNPLA3	22	44324730	T	C	0.239	0.267	0.0076	3.99e-273		0.227809	-0.030792	0.029657	0.299157
rs7041363	AKNA	9	117146043	G	C	0.459	-0.13	0.007	1.02e-81		0.485893	0.0713814	0.0248556	0.00408084	Palindromic with intermediate allele frequency
rs2980888	lnc-TRIB1-2;WASHC5	8	126507308	T	C	0.286	0.13	0.007	4.21e-72		0.313391	0.0458921	0.0266101	0.084598
rs58542926	TM6SF2	19	19379549	T	C	0.07	0.209	0.013	6.54e-62		0.0711857	-0.0251935	0.0486631	0.604644
rs2642438	MTARC1	1	220970028	A	G	0.274	-0.075	0.007	6.65e-24		0.289662	0.0137906	0.0274876	0.615865
rs4918722	GPAM	10	113947040	C	T	0.277	0.077	0.008	1.75e-23		0.295016	0.029707	0.0269825	0.2709
rs5117	APOE;APOC1	19	45418790	C	T	0.231	-0.072	0.008	2.21e-20		0.213232	-0.0079929	0.0303224	0.792119
rs2943652	MIR5702;lnc-RHBDD1-6;lnc-RHBDD1-3	2	227108446	C	T	0.353	-0.062	0.007	1.04e-19		0.360052	-0.0135686	0.0258412	0.599532
rs1801689	APOH	17	64210580	C	A	0.031	0.17	0.019	1.46e-18		0.0235839	-0.114597	0.0826135	0.165405
rs13389219	COBLL1;SCN2A	2	165528876	T	C	0.432	-0.053	0.007	8.2e-16		0.399009	-0.0605238	0.0252815	0.016665
rs3935942	CD276	15	73971361	A	C	0.384	0.055	0.007	2.72e-15		0.40599	-0.0307503	0.0255961	0.229601
rs1337101	SLC30A10	1	219726100	T	G	0.297	-0.052	0.007	1.98e-12		0.296643	-0.0499348	0.0273773	0.0681606
rs2207132	MAFB	20	39142516	A	G	0.028	0.178	0.028	1.58e-10		0.0315778	-0.00232838	0.0710564	0.973816	Removed because of linkage disequilibrium
rs11668950	IFI30;MPV17L2;PIK3R2	19	18282940	A	G	0.258	0.046	0.007	2.22e-10		0.271396	0.0273391	0.0278502	0.326257
rs17036160	PPARG	3	12329783	T	C	0.115	-0.068	0.011	3.39e-10		0.12472	-0.0178913	0.0376481	0.634626
rs56094641	FTO	16	53806453	G	A	0.377	0.042	0.007	1.36e-09		0.419591	0.0586882	0.0251707	0.0197215
rs17598226	MTTP	4	100496891	G	C	0.261	-0.042	0.007	5.61e-09		0.264595	0.0404155	0.0282811	0.152975
Abbreviations: chr., chromosome; est., estimate; LD, linkage disequilibrium; SNP, single nucleotide polymorphism; std., standard
